# Supplementary material for: Impact of Remote Ischemic Preconditioning Conducted in Living Kidney Donors on Renal Function in Donors and Recipients Following Living Donor Kidney Transplantation: A Randomized Clinical Trial
Source: PubMed Central journal article supplement (PMC6572316; doi:10.3390/jcm8050713), 2019-05-20
Supplement: jcm-08-00713-s001.pdf [file jcm-08-00713-s001.pdf]

## Supplementary

**Table S1.** Comparison of perioperative characteristics of kidney donor and recipients according to gender.

|                                                | Female                   |                       |                 | Male                     |                       |                 |
|------------------------------------------------|--------------------------|-----------------------|-----------------|--------------------------|-----------------------|-----------------|
|                                                | Control ( <i>n</i> = 39) | RIPC ( <i>n</i> = 59) | <i>p</i> -Value | Control ( <i>n</i> = 46) | RIPC ( <i>n</i> = 26) | <i>p</i> -Value |
| Age, year                                      | 45.2 ± 8.7               | 44.1 ± 9.0            | 0.54            | 38.3 ± 12.6              | 41.7 ± 9.1            | 0.24            |
| ASA PS 1/2                                     | 28/11                    | 43/16                 | 1.00            | 32/14                    | 16/10                 | 0.66            |
| Weight                                         | 57.3 ± 8.1               | 58.7 ± 7.8            | 0.41            | 73.4 ± 10.1              | 72.3 ± 10.1           | 0.66            |
| Height                                         | 157.9 ± 6.2              | 158.5 ± 5.7           | 0.64            | 171.4 ± 5.6              | 171.8 ± 6.5           | 0.79            |
| Body mass index, kg/m <sup>2</sup>             | 23.0 ± 2.7               | 23.4 ± 2.9            | 0.50            | 24.9 ± 2.6               | 24.4 ± 2.7            | 0.45            |
| Preoperative hemoglobin                        | 12.9 ± 0.9               | 13.1 ± 1.0            | 0.58            | 14.9 ± 1.0               | 14.9 ± 1.0            | 0.79            |
| Preoperative serum creatinine, mg/dL           | 0.7 (0.6–0.7)            | 0.6 (0.6–0.7)         | 0.60            | 0.9 (0.8–1.0)            | 0.9 (0.8–1.0)         | 0.79            |
| Preoperative, eGFR, mL/min/1.73 m <sup>2</sup> | 106.3 ± 7.7              | 108.0 ± 10.5          | 0.35            | 106.8 ± 13.5             | 104.1 ± 10.6          | 0.37            |
| Operation time                                 | 205.9 ± 28.3             | 202.9 ± 39.8          | 0.61            | 225.0 ± 39.8             | 216.2 ± 37.4          | 0.36            |
| Operation site (right), <i>n</i> (%)           | 14 (35.9)                | 28 (47.5)             | 0.36            | 20 (43.5)                | 8 (30.8)              | 0.42            |
| Urine output, mL                               | 324.1 ± 168.1            | 307.9 ± 159.3         | 0.63            | 329.1 ± 159.5            | 291.5 ± 127.8         | 0.31            |
| Mean blood pressure, mmHg                      |                          |                       |                 |                          |                       |                 |
| Before RIPC                                    | 80.7 ± 10.2              | 79.6 ± 12.2           | 0.62            | 84.5 ± 12.4              | 79.2 ± 10.6           | 0.07            |
| After RIPC                                     | 83.0 ± 9.1               | 84.0 ± 12.1           | 0.67            | 85.2 ± 10.0              | 88.5 ± 14.1           | 0.30            |
| Cystatin C, mg/L                               | 0.7 (0.6–0.8)            | 0.6 (0.6–0.7)         | 0.02            | 0.8 (0.7–0.9)            | 0.8 (0.8–0.8)         | 0.76            |

RIPC, remote ischemic preconditioning; ASA PS, American Society of Anesthesiologists physical status; eGFR, estimated glomerular filtration rate based on the CKD-EPI equation. Data are expressed as mean ± SD, median and interquartile range, or number (%), as appropriate.

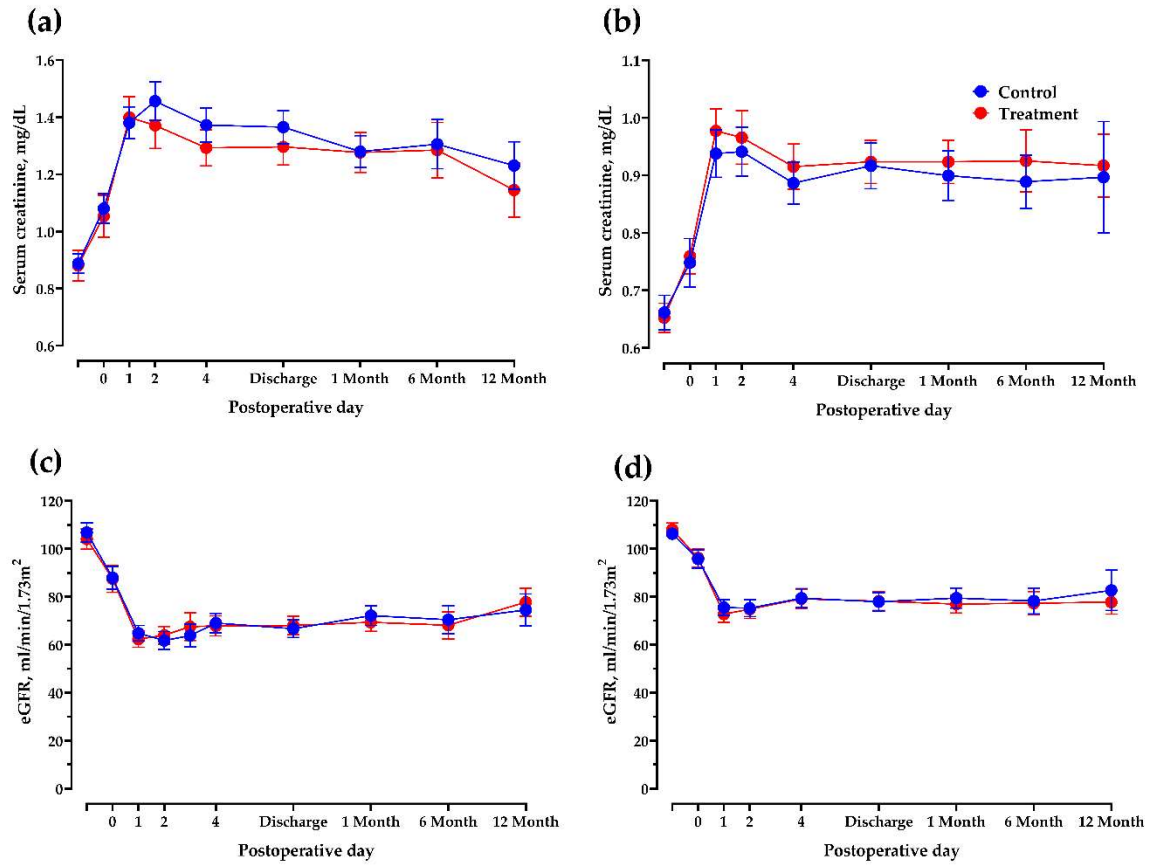

**Figure S1.** Serial changes in serum creatinine concentration and estimated glomerular filtration rate in male and female kidney transplant donors for 1 year after transplantation: **(a)** Among male donors, postoperative serum creatinine (sCr) concentrations were not significantly different in the control and the RIPC group during the postoperative period. **(b)** Among female donors, sCr concentration did not differ in the RIPC and control groups at any time point. **(c)** Among male donors, estimated glomerular filtration rate (eGFR) was calculated using the CKD-EPI equation. Among male donors, eGFR did not differ between RIPC and control groups at any time point. **(d)** Among female donors, estimated glomerular filtration rate (eGFR) was calculated using the CKD-EPI equation. eGFR did not differ between RIPC and control groups at any time point.
